# Supplementary figures and images for: EVER2 protein binds TRADD to promote TNF-α-induced apoptosis
Source: PubMed Central journal article supplement — Cell Death Dis. 2013 Feb 21;4(2):e499–. doi: 10.1038/cddis.2013.27 (PMC3734840; doi:10.1038/cddis.2013.27), 2013-02-21

Figure S1

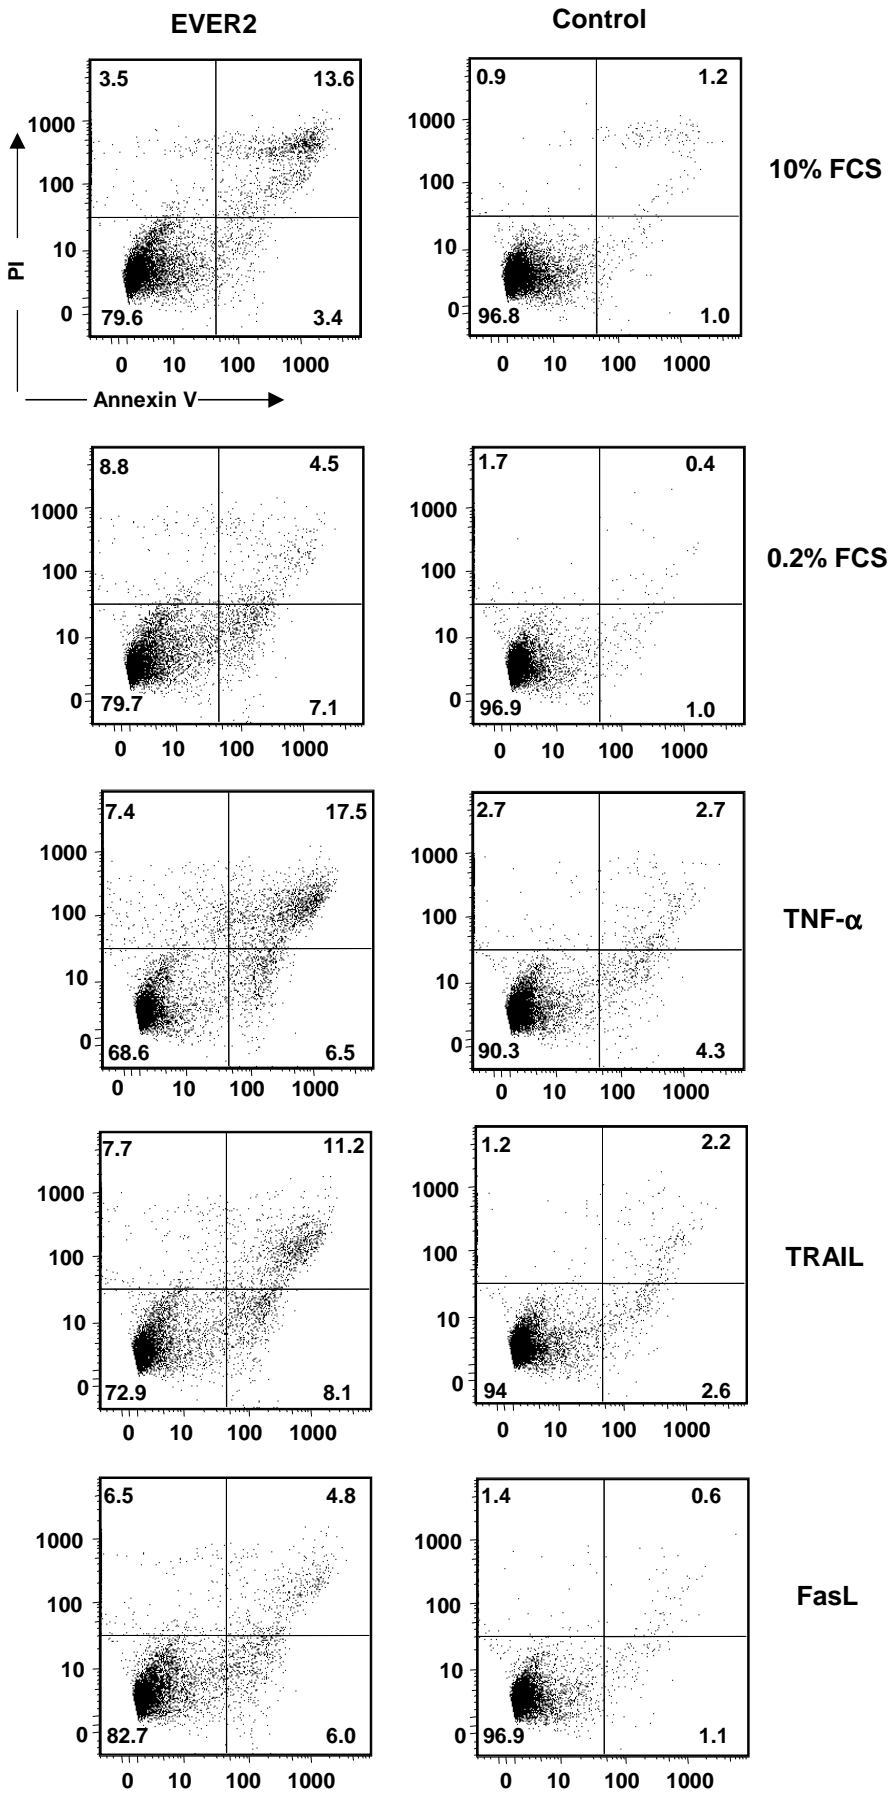

Supplement: cddis201327x1.pdf [file cddis201327x1.pdf]
